# Supplementary material
Source: PubMed Central journal article supplement (PMC7173284)
Supplement: NIHMS1547685-supplement-Supp_1.pdf [file NIHMS1547685-supplement-Supp_1.pdf]

# Supplemental Online Material for the article “Nonparametric tests for transition probabilities in nonhomogeneous Markov processes”

## Abstract

This Supplemental Online Material for the article “Nonparametric tests for transition probabilities in nonhomogeneous Markov processes” includes additional simulation results for the proposed tests with weight function  $\hat{W}_{12}(t) = I[\prod_{l=1}^2 \bar{Y}_l^{(1)}(t)\bar{Y}_l^{(2)}(t) > 0]$ . This weight function assigns a weight equal to 1 for observation times where the sizes of all the involved risk sets are non-zero.

Table 1: Simulation results about empirical type I error rates for the linear test (Linear), the  $L^2$ -norm-based test ( $L^2$ ), and the Kolmogorov–Smirnov-type test (KS) for testing  $H_0 : P_{0,12}^{(1)}(0, \cdot) = P_{0,12}^{(2)}(0, \cdot)$ , under simulation scenarios 1 and 2. The weight function was  $\hat{W}_{12}(t) = I[\prod_{l=1}^2 \bar{Y}_l^{(1)}(t)\bar{Y}_l^{(2)}(t) > 0]$ .

| $H_0$ scenario                                                                      | $n_1$ | $n_2$ | $\alpha = 0.01$ |       |       | $\alpha = 0.05$ |       |       |
|-------------------------------------------------------------------------------------|-------|-------|-----------------|-------|-------|-----------------|-------|-------|
|                                                                                     |       |       | Linear          | $L^2$ | KS    | Linear          | $L^2$ | KS    |
| 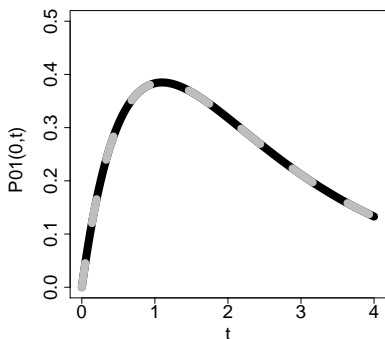  | 50    | 50    | 0.007           | 0.009 | 0.014 | 0.043           | 0.048 | 0.065 |
|                                                                                     | 100   | 50    | 0.016           | 0.016 | 0.018 | 0.054           | 0.056 | 0.068 |
|                                                                                     | 100   | 100   | 0.015           | 0.016 | 0.016 | 0.049           | 0.054 | 0.062 |
|                                                                                     | 200   | 100   | 0.010           | 0.010 | 0.011 | 0.043           | 0.052 | 0.055 |
|                                                                                     | 200   | 200   | 0.011           | 0.013 | 0.019 | 0.053           | 0.052 | 0.057 |
|  | 50    | 50    | 0.009           | 0.009 | 0.011 | 0.043           | 0.049 | 0.062 |
|                                                                                     | 100   | 50    | 0.009           | 0.011 | 0.018 | 0.056           | 0.049 | 0.059 |
|                                                                                     | 100   | 100   | 0.013           | 0.012 | 0.012 | 0.045           | 0.048 | 0.056 |
|                                                                                     | 200   | 100   | 0.005           | 0.008 | 0.010 | 0.047           | 0.049 | 0.054 |
|                                                                                     | 200   | 200   | 0.010           | 0.014 | 0.016 | 0.060           | 0.056 | 0.060 |

Table 2: Simulation results about empirical type I error rates for the linear test (Linear), the  $L^2$ -norm-based test ( $L^2$ ), and the Kolmogorov–Smirnov-type test (KS) for testing  $H_0 : P_{0,12}^{(1)}(0, \cdot) = P_{0,12}^{(2)}(0, \cdot)$ , under simulation scenarios 3 and 4. The weight function was  $\hat{W}_{12}(t) = I[\prod_{l=1}^2 \bar{Y}_l^{(1)}(t)\bar{Y}_l^{(2)}(t) > 0]$ .

| $H_0$ scenario                                                                      | $n_1$ | $n_2$ | $\alpha = 0.01$ |       |       | $\alpha = 0.05$ |       |       |
|-------------------------------------------------------------------------------------|-------|-------|-----------------|-------|-------|-----------------|-------|-------|
|                                                                                     |       |       | Linear          | $L^2$ | KS    | Linear          | $L^2$ | KS    |
| 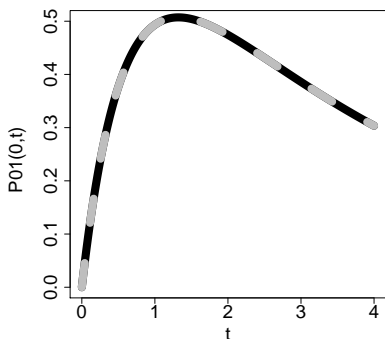  | 50    | 50    | 0.010           | 0.012 | 0.014 | 0.056           | 0.055 | 0.064 |
|                                                                                     | 100   | 50    | 0.019           | 0.019 | 0.022 | 0.060           | 0.058 | 0.076 |
|                                                                                     | 100   | 100   | 0.012           | 0.014 | 0.020 | 0.047           | 0.056 | 0.075 |
|                                                                                     | 200   | 100   | 0.010           | 0.013 | 0.013 | 0.047           | 0.047 | 0.067 |
|                                                                                     | 200   | 200   | 0.010           | 0.012 | 0.012 | 0.057           | 0.056 | 0.062 |
|  | 50    | 50    | 0.007           | 0.010 | 0.013 | 0.045           | 0.046 | 0.071 |
|                                                                                     | 100   | 50    | 0.011           | 0.015 | 0.019 | 0.049           | 0.050 | 0.073 |
|                                                                                     | 100   | 100   | 0.012           | 0.013 | 0.014 | 0.048           | 0.049 | 0.061 |
|                                                                                     | 200   | 100   | 0.008           | 0.009 | 0.016 | 0.040           | 0.041 | 0.060 |
|                                                                                     | 200   | 200   | 0.010           | 0.013 | 0.013 | 0.056           | 0.056 | 0.061 |

Table 3: Simulation results about empirical power levels for the linear test (Linear), the  $L^2$ -norm-based test ( $L^2$ ), and the Kolmogorov–Smirnov-type test (KS) for testing  $H_0 : P_{0,12}^{(1)}(0, \cdot) = P_{0,12}^{(2)}(0, \cdot)$ , under simulation scenarios 5 and 6. The weight function was  $\hat{W}_{12}(t) = I[\prod_{l=1}^2 \bar{Y}_l^{(1)}(t)\bar{Y}_l^{(2)}(t) > 0]$ .

| $H_1$ scenario                                                                      | $n_1$ | $n_2$ | $\alpha = 0.01$ |       |       | $\alpha = 0.05$ |       |       |
|-------------------------------------------------------------------------------------|-------|-------|-----------------|-------|-------|-----------------|-------|-------|
|                                                                                     |       |       | Linear          | $L^2$ | KS    | Linear          | $L^2$ | KS    |
| 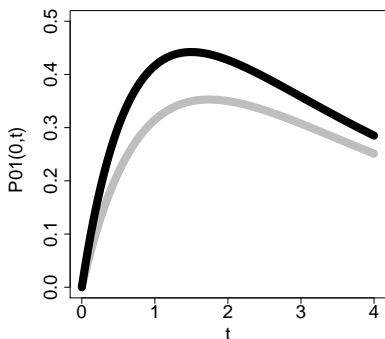  | 50    | 50    | 0.032           | 0.032 | 0.049 | 0.116           | 0.112 | 0.153 |
|                                                                                     | 100   | 50    | 0.053           | 0.050 | 0.067 | 0.145           | 0.139 | 0.187 |
|                                                                                     | 100   | 100   | 0.049           | 0.050 | 0.072 | 0.142           | 0.147 | 0.214 |
|                                                                                     | 200   | 100   | 0.069           | 0.068 | 0.112 | 0.189           | 0.194 | 0.271 |
|                                                                                     | 200   | 200   | 0.075           | 0.073 | 0.154 | 0.215           | 0.240 | 0.352 |
|  | 50    | 50    | 0.092           | 0.093 | 0.149 | 0.231           | 0.239 | 0.329 |
|                                                                                     | 100   | 50    | 0.133           | 0.130 | 0.214 | 0.295           | 0.308 | 0.451 |
|                                                                                     | 100   | 100   | 0.143           | 0.154 | 0.293 | 0.319           | 0.375 | 0.576 |
|                                                                                     | 200   | 100   | 0.213           | 0.239 | 0.447 | 0.389           | 0.473 | 0.711 |
|                                                                                     | 200   | 200   | 0.248           | 0.324 | 0.640 | 0.456           | 0.609 | 0.854 |

Table 4: Simulation results about empirical power levels for the linear test (Linear), the  $L^2$ -norm-based test ( $L^2$ ), and the Kolmogorov–Smirnov-type test (KS) for testing  $H_0 : P_{0,12}^{(1)}(0, \cdot) = P_{0,12}^{(2)}(0, \cdot)$ , under simulation scenarios 7 and 8. The weight function was  $\hat{W}_{12}(t) = I[\prod_{l=1}^2 \bar{Y}_l^{(1)}(t)\bar{Y}_l^{(2)}(t) > 0]$ .

| $H_1$ scenario                                                                      | $n_1$ | $n_2$ | $\alpha = 0.01$ |       |       | $\alpha = 0.05$ |       |       |
|-------------------------------------------------------------------------------------|-------|-------|-----------------|-------|-------|-----------------|-------|-------|
|                                                                                     |       |       | Linear          | $L^2$ | KS    | Linear          | $L^2$ | KS    |
| 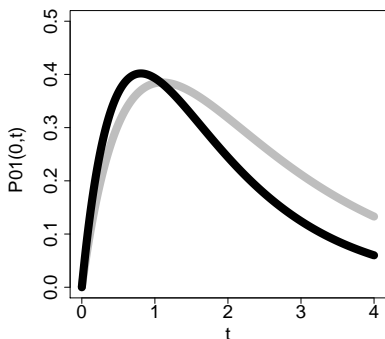  | 50    | 50    | 0.015           | 0.028 | 0.038 | 0.060           | 0.112 | 0.142 |
|                                                                                     | 100   | 50    | 0.027           | 0.054 | 0.056 | 0.094           | 0.170 | 0.166 |
|                                                                                     | 100   | 100   | 0.036           | 0.079 | 0.075 | 0.125           | 0.237 | 0.212 |
|                                                                                     | 200   | 100   | 0.054           | 0.125 | 0.105 | 0.172           | 0.320 | 0.280 |
|                                                                                     | 200   | 200   | 0.099           | 0.243 | 0.164 | 0.264           | 0.503 | 0.380 |
|  | 50    | 50    | 0.073           | 0.202 | 0.241 | 0.207           | 0.464 | 0.493 |
|                                                                                     | 100   | 50    | 0.186           | 0.393 | 0.384 | 0.389           | 0.662 | 0.635 |
|                                                                                     | 100   | 100   | 0.352           | 0.679 | 0.622 | 0.589           | 0.878 | 0.844 |
|                                                                                     | 200   | 100   | 0.572           | 0.873 | 0.789 | 0.791           | 0.970 | 0.936 |
|                                                                                     | 200   | 200   | 0.846           | 0.982 | 0.952 | 0.948           | 0.997 | 0.990 |
